# Supplementary material for: Revised International Staging System (R-ISS) stage-dependent analysis uncovers oncogenes and potential immunotherapeutic targets in multiple myeloma (MM)
Source: eLife journal article supplement (doi:10.7554/elife.75340), 2022-10-25
Supplement: supp [file elife-75340-supp-v1.zip]

Archive with 10 entries (10 files):
- elife_poa_e75340_Figure_1_figure_supplement_1.pdf
- elife_poa_e75340_Figure_2_figure_supplement_1.pdf
- elife_poa_e75340_Figure_2_figure_supplement_2.pdf
- elife_poa_e75340_Figure_3_figure_supplement_1.pdf
- elife_poa_e75340_Figure_3_figure_supplement_2.pdf
- elife_poa_e75340_Figure_4_figure_supplement_1.pdf
- elife_poa_e75340_Figure_6_figure_supplement_1.pdf
- elife_poa_e75340_Figure_7_figure_supplement_1.pdf
- elife_poa_e75340_Figure_8_figure_supplement_1.pdf
- elife_poa_e75340_Figure_8_figure_supplement_2.pdf
