# Supplementary material for: Revised International Staging System (R-ISS) stage-dependent analysis uncovers oncogenes and potential immunotherapeutic targets in multiple myeloma (MM)
Source: eLife journal article supplement (doi:10.7554/elife.75340), 2022-10-25
Supplement: supp1 [file Supplementary file 1.doc]

gene Cluster_6_in_MM_III_mean Cluster_6_in_MM_I_mean log2FC p_val p_val_adj pct.1 pct.2

RAB13 0.007780544 0.545459842 -0.616854657 0 0 0.003 0.584

IGHD 9.62E-05 1.934449815 -1.552951277 0 0 0 0.74

MC4R 0 0.569359114 -0.65017552 0 0 0 0.351

IGLC3 0.042182577 189.7444472 -7.515889208 0 0 0.018 0.935

AC004556.1 0.002036628 0.538573636 -0.618658246 0 0 0.001 0.571

FRZB 0.00815485 1.779142104 -1.462922355 0 0 0.005 0.727

IGLV5-45 0.000616686 6.047256357 -2.816172281 0 0 0 0.753

BCHE 0 1.208830779 -1.143282896 0 0 0 0.649

LINC01287 0.00593611 0.77464051 -0.818988129 0 0 0.006 0.61

DEFA3 0.062244128 3.448140698 -2.066087053 3.46E-261 9.76E-257 0.008 0.481

IGLC2 1.955582438 763.4758991 -8.014884748 8.99E-242 2.53E-237 0.062 1

CAMP 0.013589067 3.142537748 -2.031041975 2.45E-231 6.91E-227 0.002 0.273

SEL1L3 0.041002677 0.982482458 -0.929334322 6.24E-214 1.76E-209 0.044 0.844

RPS4Y1 0.000781494 0.749909071 -0.806152942 1.96E-211 5.51E-207 0.001 0.195

DPEP1 0.028332553 0.957795342 -0.928923067 9.77E-205 2.75E-200 0.027 0.662

MNDA 0.011537872 0.617781639 -0.677466557 1.36E-196 3.84E-192 0.005 0.338

LCN2 0.010245109 0.772127187 -0.810776784 4.21E-195 1.19E-190 0.002 0.247

S100A8 0.253932098 21.56931717 -4.169831639 4.58E-186 1.29E-181 0.044 0.779

IGLV1-40 9.00E-05 1.390741212 -1.257328079 3.45E-171 9.71E-167 0 0.143

S100A9 0.21601344 10.35896368 -3.223600139 1.64E-150 4.62E-146 0.054 0.766

RETN 0.013371402 1.009217658 -0.987470839 3.13E-144 8.82E-140 0.004 0.26

S100A12 0.027856842 1.211628194 -1.105469526 2.61E-141 7.34E-137 0.009 0.338

LTF 0.014095002 1.053462412 -1.017865727 1.32E-132 3.73E-128 0.005 0.26

ANKRD37 0.038185806 0.921784016 -0.888381536 2.76E-116 7.77E-112 0.042 0.597

ICAM3 0.086725367 1.31544242 -1.091300487 3.29E-115 9.28E-111 0.064 0.727

LYZ 0.058920686 1.294474251 -1.115569083 3.88E-113 1.09E-108 0.02 0.429

AHSP 0.016986 0.939310743 -0.931244172 1.77E-105 4.99E-101 0.001 0.13

HBA2 0.089700796 0.885722577 -0.791185384 2.81E-99 7.92E-95 0.014 0.338

PPDPF 0.095837671 0.945636566 -0.828208144 5.20E-94 1.47E-89 0.084 0.753

HBA1 0.074814358 1.539372701 -1.240384655 2.91E-93 8.19E-89 0.013 0.312

ATF5 0.09851889 2.042078058 -1.469497494 1.32E-88 3.71E-84 0.092 0.74

FAM107B 0.066942759 0.730477668 -0.697687546 6.32E-79 1.78E-74 0.053 0.558

CAV1 0.138349117 1.430975988 -1.094592562 3.14E-74 8.84E-70 0.127 0.792

PAGE5 0.097427352 1.194803594 -0.999966405 3.28E-65 9.24E-61 0.045 0.468

ARHGDIB 0.073053657 0.707697192 -0.670329961 1.22E-61 3.45E-57 0.044 0.455

ARHGAP18 0.136527171 1.235116536 -0.975717879 1.49E-61 4.19E-57 0.129 0.74

MIB2 0.15023411 0.932200959 -0.748317623 4.95E-57 1.39E-52 0.132 0.74

IFITM1 0.098405514 0.785186401 -0.700663948 3.72E-56 1.05E-51 0.059 0.506

PHGDH 0.293589927 2.540256079 -1.452473369 1.88E-47 5.28E-43 0.213 0.792

DEK 0.182316793 1.487300404 -1.072964113 5.45E-47 1.53E-42 0.135 0.675

CD74 0.034042765 0.717399206 -0.731929577 1.18E-45 3.34E-41 0.02 0.26

RPL14 12.08605754 34.2059092 -1.427787082 5.47E-45 1.54E-40 0.972 1

EBPL 0.216702025 0.957456606 -0.686004436 1.63E-44 4.59E-40 0.199 0.831

CD48 16.60488014 2.006247867 2.549939535 1.69E-44 4.77E-40 0.973 0.857

CCND2 0.80745421 10.47914071 -2.666983648 2.57E-44 7.25E-40 0.386 0.922

ZFP36L2 0.490807468 5.739225419 -2.176488832 7.17E-43 2.02E-38 0.319 0.909

IGKC 1047.36883 138.0002258 2.914987234 1.60E-42 4.51E-38 1 0.844

RPL32 22.08609043 54.83019667 -1.274021761 3.25E-42 9.15E-38 0.996 1

RPL26 15.97100214 48.18567787 -1.535166527 4.27E-42 1.20E-37 0.984 1

LRRC75A 0.144703249 1.718520028 -1.247847812 9.66E-42 2.72E-37 0.101 0.558

HLA-A 29.99076561 7.452935968 1.87431397 8.89E-41 2.50E-36 0.994 0.974

DPP7 0.309463821 1.388842091 -0.867335291 9.49E-41 2.67E-36 0.238 0.857

CTAG2 5.6050141 0.086454621 2.603933724 5.08E-40 1.43E-35 0.888 0.052

ITM2A 0.652065568 3.911754487 -1.571967503 5.70E-40 1.60E-35 0.276 0.87

TSPO 0.225860804 1.17373558 -0.826381287 3.63E-39 1.02E-34 0.17 0.727

RPS4X 22.82878602 53.45563324 -1.192375844 4.08E-38 1.15E-33 0.993 1

C12orf45 0.502288962 2.199032462 -1.090473293 5.99E-38 1.69E-33 0.356 0.922

RPL15 21.08890749 48.56306078 -1.165943219 9.03E-38 2.54E-33 0.992 1

FXYD5 0.52018577 2.597774462 -1.242857115 1.43E-37 4.02E-33 0.331 0.896

RPL22L1 0.704446083 4.342315489 -1.648162214 1.96E-37 5.51E-33 0.45 0.935

RPL6 15.62528101 36.71389279 -1.181717345 2.58E-37 7.28E-33 0.985 1

MYO6 0.180808568 1.044454405 -0.791940794 5.95E-37 1.68E-32 0.168 0.688

LINC01480 9.884579607 0.869029945 2.541924099 7.89E-37 2.22E-32 0.927 0.584

RPS2 33.94284197 101.9209111 -1.558467278 1.33E-35 3.74E-31 0.997 1

HLA-B 41.30165634 10.80662484 1.841117553 4.06E-35 1.14E-30 0.995 0.974

SNHG25 4.649486723 0.157346773 2.287298599 4.23E-35 1.19E-30 0.858 0.182

IGKV2D-28 3.507532939 0 2.172338034 5.95E-34 1.68E-29 0.801 0

RPL34 19.28085856 39.02217039 -0.980680679 1.42E-33 4.01E-29 0.993 1

PTP4A3 5.919293039 0.399717682 2.305488772 3.84E-33 1.08E-28 0.868 0.416

RPSA 11.5687838 25.68506059 -1.08618723 4.96E-33 1.40E-28 0.963 1

UQCRB 11.00636581 4.458109683 1.137326238 5.47E-33 1.54E-28 0.97 0.961

RPL21 16.90095804 34.33820056 -0.981191778 1.94E-32 5.46E-28 0.987 1

RPS12 33.30313905 73.57013342 -1.120257321 2.08E-32 5.86E-28 0.999 1

EEF1A1 40.9523159 109.5195137 -1.39747876 2.20E-32 6.18E-28 1 1

JCHAIN 146.3627584 57.74200773 1.326907491 3.98E-32 1.12E-27 1 1

COX6C 9.627015472 3.330114865 1.295259281 1.16E-31 3.28E-27 0.956 0.974

NME4 0.318150303 1.195863877 -0.73627374 8.20E-31 2.31E-26 0.251 0.779

IKBIP 0.227751559 0.970352668 -0.682435222 1.21E-30 3.40E-26 0.215 0.74

RPL5 17.88102613 44.8321613 -1.279423147 1.80E-30 5.06E-26 0.99 1

CTSS 0.406554705 1.400246283 -0.77101678 3.05E-30 8.59E-26 0.249 0.805

RPL19 30.19040868 58.02582738 -0.920243903 6.89E-30 1.94E-25 0.998 1

RPL12 22.09695419 61.6877467 -1.440480858 1.05E-29 2.97E-25 0.994 1

WARS 7.764080308 0.651224362 2.408066543 2.80E-29 7.89E-25 0.867 0.494

IGHG2 1.95137278 46.38289582 -4.004908312 7.10E-29 2.00E-24 0.5 0.831

HBD 7.665298845 0.896645391 2.191799537 8.73E-29 2.46E-24 0.852 0.156

SPAG4 0.257442518 1.099729279 -0.73971088 1.69E-28 4.77E-24 0.214 0.688

MZB1 12.96893863 37.43000898 -1.460010906 3.61E-27 1.02E-22 0.955 0.961

PIM2 3.297825671 0.229106235 1.805997348 7.53E-27 2.12E-22 0.781 0.195

ATP5IF1 10.66289645 4.577633998 1.064200949 1.03E-26 2.89E-22 0.967 0.974

RPS3A 33.76494952 63.89286571 -0.900426383 1.37E-26 3.85E-22 0.999 1

RPL18 30.37302208 54.55008451 -0.8242646 2.77E-26 7.82E-22 0.997 1

HLA-C 26.25137534 11.77015435 1.093553079 2.98E-26 8.40E-22 0.989 0.987

CADM1 4.450756216 0.323422517 2.042182666 5.04E-26 1.42E-21 0.793 0.286

RNASET2 0.712512866 2.133954285 -0.871869308 7.45E-26 2.10E-21 0.442 0.909

LETM1 4.445608793 0.218797948 2.159634369 8.67E-26 2.44E-21 0.773 0.273

RPL9 20.91534195 35.98085448 -0.75483737 1.22E-25 3.45E-21 0.995 1

SPCS1 5.028259456 12.43268653 -1.155934455 1.79E-25 5.04E-21 0.835 0.987

ENO1 8.408177291 2.791159796 1.31127598 2.51E-25 7.06E-21 0.938 0.974

ITM2B 1.533270888 5.226915421 -1.297516328 3.01E-25 8.47E-21 0.636 0.948

COMMD6 0.59128099 1.679860375 -0.751969226 4.38E-25 1.23E-20 0.386 0.896

ANXA11 0.398233473 1.190513198 -0.64766363 4.40E-25 1.24E-20 0.303 0.805

RPL7A 39.41369233 67.70656876 -0.765603869 1.49E-24 4.21E-20 0.999 1

TMSB4X 36.77745585 13.46203069 1.385255403 2.06E-24 5.81E-20 0.994 0.974

TMSB10 17.6572022 8.821542723 0.925711099 3.02E-24 8.50E-20 0.983 0.987

DNAJC15 0.51068138 1.502360008 -0.72808995 3.32E-24 9.36E-20 0.353 0.844

RPS7 25.19779356 39.25693267 -0.619791942 5.46E-24 1.54E-19 0.995 1

FKBP11 2.949700412 9.939287342 -1.469703622 6.19E-24 1.74E-19 0.777 0.948

RPL29 23.12871613 46.77604797 -0.985536366 7.31E-24 2.06E-19 0.992 1

PMVK 3.194202052 0.490394239 1.492702361 9.52E-24 2.68E-19 0.813 0.532

CTHRC1 0.95912012 6.55914127 -1.948016495 1.19E-23 3.35E-19 0.466 0.753

UCHL1 1.950088603 0.018655649 1.534091846 1.35E-23 3.79E-19 0.661 0.026

TMEM238 0.668450149 2.147178448 -0.915550402 2.56E-23 7.22E-19 0.428 0.857

IGLL5 2.857040513 0.353776972 1.510504218 5.72E-23 1.61E-18 0.784 0.429

IDH2 4.823232568 0.970847726 1.563003925 7.89E-23 2.22E-18 0.86 0.74

TM9SF2 0.41420394 1.169642073 -0.617466876 1.53E-22 4.32E-18 0.322 0.766

PTMA 29.3171059 47.34659098 -0.673282127 2.10E-22 5.91E-18 0.997 1

KRTCAP2 3.546783352 9.876656767 -1.258317005 2.44E-22 6.87E-18 0.797 1

NES 4.103321697 0.012258838 2.333858348 3.49E-22 9.84E-18 0.631 0.013

RPL41 33.01828639 51.52941218 -0.626814971 4.44E-22 1.25E-17 0.999 1

XBP1 18.08969757 7.852267132 1.108675354 5.49E-22 1.55E-17 0.971 0.961

RPS13 20.7968874 35.07030872 -0.726689638 5.53E-22 1.56E-17 0.994 1

RPS9 20.33829238 33.77591191 -0.704643619 1.02E-21 2.87E-17 0.992 1

PLPP5 0.893021128 2.414018421 -0.85078033 1.71E-21 4.81E-17 0.497 0.909

DNAJC1 2.000622003 4.653908144 -0.913986855 1.80E-21 5.06E-17 0.681 0.974

PSMD4 3.886044887 1.062013302 1.244613478 1.80E-21 5.06E-17 0.851 0.844

FABP5 5.124828498 1.101513357 1.543240822 1.98E-21 5.57E-17 0.856 0.688

SLC44A1 0.763007652 2.379242684 -0.938661226 2.09E-21 5.87E-17 0.468 0.896

ATP5MC2 4.101868709 8.071356749 -0.830292569 4.02E-21 1.13E-16 0.86 1

RPL28 42.22774532 65.43119678 -0.619903315 4.78E-21 1.35E-16 0.999 1

TSTD1 3.862465401 0.962008251 1.309356876 8.34E-21 2.35E-16 0.842 0.636

POU2AF1 2.842021944 0.442265152 1.41352934 1.51E-20 4.25E-16 0.772 0.481

YBX1 20.16527903 11.4412722 0.766565491 3.20E-20 9.02E-16 0.989 0.987

HLA-F 2.421832917 0.273076409 1.426450306 3.34E-20 9.42E-16 0.719 0.221

RPS27 67.77222233 44.68076835 0.590239049 4.30E-20 1.21E-15 1 1

RRBP1 2.375725766 6.605027544 -1.171755765 4.34E-20 1.22E-15 0.699 0.974

HMGA1 5.217273984 1.574485602 1.271997955 5.86E-20 1.65E-15 0.876 0.857

RPL13A 23.62391261 40.8337488 -0.76460727 1.18E-19 3.31E-15 0.994 1

TPT1 30.64991334 59.82988685 -0.942578771 1.29E-19 3.62E-15 0.999 1

TNFRSF13B 2.317758199 0.094173173 1.600367656 1.33E-19 3.75E-15 0.634 0.091

NENF 0.649800859 1.560923709 -0.634372382 1.53E-19 4.31E-15 0.417 0.883

HLA-E 7.267771286 2.815805642 1.11551079 1.69E-19 4.75E-15 0.907 0.857

IFI6 0.381311844 1.899300573 -1.069665848 1.74E-19 4.90E-15 0.263 0.675

EEF1B2 17.54783519 27.32842643 -0.610999654 2.09E-19 5.88E-15 0.988 1

PCBP2 1.167379846 2.880939867 -0.840454063 2.29E-19 6.45E-15 0.58 0.961

MT-ND3 39.37294689 18.37052113 1.059526128 3.13E-19 8.82E-15 0.995 0.974

RTRAF 1.003326119 2.338571345 -0.736833576 3.73E-19 1.05E-14 0.546 0.883

PRRC2C 4.845806201 1.474968565 1.2399918 5.93E-19 1.67E-14 0.823 0.831

ASS1 0.822070457 3.310494093 -1.242274501 6.52E-19 1.84E-14 0.386 0.74

RPL24 21.07350307 32.60955755 -0.606555947 6.97E-19 1.96E-14 0.993 1

LILRB4 1.527516508 0.034572035 1.288686414 9.44E-19 2.66E-14 0.588 0.039

RPL31 5.767514558 9.993533843 -0.69995722 1.15E-18 3.23E-14 0.91 0.987

RACK1 15.78860061 27.27436507 -0.752012646 1.16E-18 3.27E-14 0.983 1

ATP5MG 10.25094027 5.667118601 0.75491028 1.29E-18 3.62E-14 0.966 0.987

UFC1 4.641338435 1.831989254 0.994221698 1.41E-18 3.98E-14 0.879 0.922

YBX3 1.904571142 0.266201397 1.197818274 1.69E-18 4.76E-14 0.694 0.156

RAB11FIP2 2.859134077 0.240045036 1.63788465 2.09E-18 5.90E-14 0.699 0.364

FOSB 0.283529164 1.858838699 -1.155313146 3.32E-18 9.35E-14 0.173 0.506

PEBP1 2.102749953 4.203913905 -0.746049658 4.88E-18 1.38E-13 0.706 0.948

EIF4B 2.216387319 5.122927832 -0.928780532 6.32E-18 1.78E-13 0.731 0.948

RPS5 24.91047034 47.70142102 -0.910428664 6.61E-18 1.86E-13 0.995 1

AC012236.1 2.354360199 0.323658814 1.341506316 7.69E-18 2.17E-13 0.724 0.39

IMPDH2 0.758592502 1.947393562 -0.745018492 7.86E-18 2.21E-13 0.462 0.844

NSD2 3.355776334 0.570184526 1.471995762 1.23E-17 3.47E-13 0.744 0.584

AIG1 0.610768181 1.524443352 -0.648216426 1.24E-17 3.50E-13 0.417 0.818

MYC 0.499753887 1.957148135 -0.979480745 1.37E-17 3.86E-13 0.306 0.714

LDHA 6.541145104 2.6360636 1.052406175 1.55E-17 4.37E-13 0.91 0.935

TRAM1 6.737936155 2.890516133 0.991987263 1.97E-17 5.54E-13 0.875 0.974

CYTOR 4.074534378 1.139300436 1.246136348 2.66E-17 7.50E-13 0.816 0.753

RAB4A 0.648358432 1.493456475 -0.597117032 4.22E-17 1.19E-12 0.42 0.805

TMEM59 1.903219774 3.796072067 -0.724199549 8.40E-17 2.37E-12 0.679 0.935

LAX1 1.749952807 0.166359691 1.237394094 8.83E-17 2.49E-12 0.639 0.208

LAMP5 0.049960955 0.732248543 -0.722310264 1.00E-16 2.82E-12 0.042 0.234

TMED2 1.120370643 2.358607091 -0.663546559 1.08E-16 3.04E-12 0.571 0.948

NDUFB1 3.838507376 1.35328084 1.039888559 1.13E-16 3.19E-12 0.854 0.831

LGALS1 8.747011962 2.949704778 1.303215192 1.16E-16 3.28E-12 0.91 0.883

CALR 8.823187574 4.498499193 0.837153357 1.23E-16 3.47E-12 0.914 0.974

SELENOF 0.618336856 1.46681986 -0.608140431 1.27E-16 3.58E-12 0.416 0.831

MAPKAPK2 2.790146182 0.574235607 1.267602016 1.35E-16 3.79E-12 0.758 0.597

SLC25A5 9.701997842 5.16279931 0.796222427 1.39E-16 3.92E-12 0.947 1

RPL17 2.617915647 4.874971534 -0.69942309 1.42E-16 4.00E-12 0.783 0.974

MLEC 1.310971827 2.65974242 -0.66324244 1.44E-16 4.04E-12 0.615 0.948

HSPB1 0.862327599 1.826987117 -0.602158431 2.21E-16 6.22E-12 0.406 0.831

PSMD7 4.279174969 1.703972269 0.965232126 2.54E-16 7.15E-12 0.854 0.922

ZBTB38 4.019507297 1.214903399 1.180301981 3.00E-16 8.44E-12 0.804 0.818

C1QBP 1.512035002 3.104384848 -0.708309445 3.98E-16 1.12E-11 0.627 0.948

GOLM1 1.334591691 0.012330393 1.205490034 5.08E-16 1.43E-11 0.519 0.026

PARK7 6.975379033 3.658079554 0.775817806 6.92E-16 1.95E-11 0.926 0.961

JSRP1 0.851092795 2.501534278 -0.919609991 7.54E-16 2.12E-11 0.454 0.74

LY6E 6.845057104 2.866365893 1.020805775 9.38E-16 2.64E-11 0.899 0.909

EVI2B 1.31356382 2.657694362 -0.660817632 1.14E-15 3.21E-11 0.46 0.909

TIMD4 1.143837189 0 1.100195346 1.38E-15 3.88E-11 0.492 0

MT-ND2 52.34541933 29.05344415 0.82783406 1.82E-15 5.13E-11 0.998 0.974

APRT 5.133045682 2.089033276 0.989448285 2.98E-15 8.41E-11 0.883 0.922

COX17 3.613747023 1.386446633 0.951074827 3.27E-15 9.22E-11 0.85 0.753

MAP1B 1.0316312 0 1.022638535 4.78E-15 1.35E-10 0.479 0

ENSA 2.857317111 0.934018146 0.995996424 6.22E-15 1.75E-10 0.791 0.649

HIPK2 2.545134188 0.592343558 1.154688597 7.81E-15 2.20E-10 0.713 0.403

MAF 0.855440235 0 0.891761531 1.14E-14 3.21E-10 0.471 0

HSPA5 13.15915801 6.441612453 0.928048312 1.29E-14 3.64E-10 0.93 0.961

PSMB2 3.879128218 1.325747061 1.068929193 1.43E-14 4.03E-10 0.832 0.87

YWHAZ 3.383837704 1.049439942 1.096964676 1.48E-14 4.17E-10 0.808 0.818

RBM8A 4.935901761 2.200087086 0.891356049 1.49E-14 4.19E-10 0.885 0.87

UAP1 5.034425892 1.56736773 1.23292657 1.80E-14 5.07E-10 0.834 0.857

ZNF593 2.636411415 0.724736448 1.076139507 2.14E-14 6.02E-10 0.772 0.714

SRGN 5.78706047 2.523386416 0.945824161 2.27E-14 6.39E-10 0.865 0.883

MCL1 3.754837009 1.099346738 1.179455419 2.81E-14 7.90E-10 0.778 0.74

HNRNPH1 0.966353666 2.27748887 -0.737068055 2.91E-14 8.19E-10 0.529 0.896

RPS11 20.789463 32.07000039 -0.601892421 3.87E-14 1.09E-09 0.993 1

TPD52 3.468697552 1.246157306 0.992395437 4.58E-14 1.29E-09 0.809 0.766

PRDX6 4.73418498 1.995000845 0.937032035 4.99E-14 1.41E-09 0.866 0.896

ISG15 1.224207343 2.882492784 -0.803691959 5.93E-14 1.67E-09 0.417 0.844

ANP32E 4.834571453 1.959283073 0.979378989 6.85E-14 1.93E-09 0.852 0.87

GUK1 4.855299856 2.476819797 0.75197476 1.05E-13 2.95E-09 0.872 0.961

NDUFS5 7.204032526 4.064865219 0.695809334 1.07E-13 3.01E-09 0.934 0.961

ISG20 5.42176673 2.214413078 0.998414921 1.12E-13 3.15E-09 0.864 0.792

TRAF3IP3 1.066717981 0.07704438 0.940263837 1.32E-13 3.72E-09 0.498 0.052

RPL3 39.22255802 64.09032864 -0.694438363 1.37E-13 3.87E-09 0.999 1

DDIT4 0.908966096 2.848923739 -1.011663606 1.38E-13 3.90E-09 0.434 0.727

GTF3A 1.700406187 3.160583946 -0.623609598 1.54E-13 4.33E-09 0.659 0.961

SON 1.483603264 2.795452135 -0.611837025 1.77E-13 4.99E-09 0.641 0.974

COX8A 5.641876021 3.076136925 0.704388278 1.85E-13 5.20E-09 0.9 0.961

CCDC34 0.701044025 1.581858924 -0.601989692 1.95E-13 5.49E-09 0.424 0.779

PSMA4 3.759453462 1.336352407 1.026538014 2.08E-13 5.85E-09 0.833 0.844

IER2 4.218653289 0.930530755 1.434680019 2.32E-13 6.52E-09 0.729 0.584

AURKAIP1 4.765390431 2.355362076 0.780949855 2.32E-13 6.54E-09 0.884 0.935

HIST1H2AJ 0.143405195 0.729787678 -0.597258216 3.37E-13 9.48E-09 0.13 0.403

BEX3 1.171203957 0.209830695 0.843690085 4.32E-13 1.22E-08 0.537 0.091

UBALD2 4.039508218 1.077224259 1.278625975 4.38E-13 1.23E-08 0.777 0.74

PDK1 0.828521255 1.93477711 -0.682573541 5.15E-13 1.45E-08 0.476 0.805

RHOB 1.677050375 0.104730182 1.276950237 6.05E-13 1.70E-08 0.524 0.104

NDUFA1 4.396241014 2.016249524 0.839199002 1.08E-12 3.05E-08 0.87 0.87

ATP5F1E 13.38251634 8.548250227 0.591007829 1.51E-12 4.26E-08 0.982 1

HINT1 13.62848822 8.281287225 0.65638387 1.60E-12 4.50E-08 0.977 0.987

MT-CO1 35.63751698 60.06766501 -0.737086952 1.78E-12 5.02E-08 0.993 0.974

CLIC1 6.17511087 3.127464067 0.797745469 1.83E-12 5.15E-08 0.901 0.948

CD180 0.956561496 0.022951918 0.93558212 2.75E-12 7.75E-08 0.459 0.065

ITGB7 1.21994802 0.07123113 1.051256105 2.78E-12 7.83E-08 0.487 0.078

ARPC2 2.953389645 4.987909154 -0.59896218 2.82E-12 7.94E-08 0.784 1

TPM3 4.594712972 2.532514918 0.663368465 2.92E-12 8.23E-08 0.878 0.948

PABPC1 13.07566125 8.071028944 0.633864587 3.38E-12 9.54E-08 0.971 0.961

FBP1 2.44117529 0.333484667 1.367700147 4.15E-12 1.17E-07 0.638 0.377

CDV3 4.962794659 2.51956781 0.760590373 4.43E-12 1.25E-07 0.867 0.922

HIST1H3G 0.286415633 2.293488997 -1.356259887 4.44E-12 1.25E-07 0.195 0.481

NDUFA13 4.381089735 2.062145245 0.81335565 7.71E-12 2.17E-07 0.871 0.935

TIMM8B 3.228545812 1.20969457 0.936314639 8.95E-12 2.52E-07 0.803 0.818

RPL36AL 4.284825594 7.048388527 -0.60684409 1.01E-11 2.83E-07 0.865 1

DPM3 2.938763795 1.036513711 0.951641375 1.27E-11 3.58E-07 0.79 0.831

ODC1 1.706300719 3.265112866 -0.656261762 1.28E-11 3.59E-07 0.665 0.948

PSMB9 3.474810942 1.349110246 0.929712308 1.57E-11 4.43E-07 0.813 0.766

CD44 1.767493518 0.477136976 0.905776323 1.64E-11 4.62E-07 0.644 0.234

EIF3L 1.824181211 3.426144705 -0.648217957 1.65E-11 4.65E-07 0.695 0.935

MT-ATP6 68.48531946 41.38266386 0.713233936 1.69E-11 4.75E-07 0.999 0.974

TAGLN2 2.479639285 0.910019738 0.865350211 1.72E-11 4.86E-07 0.736 0.649

HRASLS2 1.298243603 0.035890354 1.149660419 1.97E-11 5.54E-07 0.435 0.052

UBB 7.145520037 4.283109164 0.624619588 3.21E-11 9.05E-07 0.929 0.961

ATP6V0B 4.520901534 2.303676851 0.740831294 4.42E-11 1.24E-06 0.839 0.922

MSN 1.555381304 0.344615128 0.926345294 8.25E-11 2.32E-06 0.63 0.364

NDUFS2 2.111212522 0.661247719 0.905209727 8.92E-11 2.51E-06 0.73 0.675

MAN1A1 0.941662191 2.082990871 -0.667038394 1.03E-10 2.89E-06 0.505 0.792

PSAP 1.850964596 3.410312966 -0.629430913 1.23E-10 3.47E-06 0.689 0.935

MALAT1 285.6668658 143.1576031 0.991728232 1.55E-10 4.36E-06 1 0.974

CYCS 4.569809511 2.303440152 0.75365878 1.55E-10 4.37E-06 0.86 0.935

CCL3 1.405819389 0 1.26652834 1.71E-10 4.80E-06 0.363 0

CHCHD7 1.492790139 0.308650356 0.92968174 1.78E-10 5.00E-06 0.638 0.429

IL32 2.895997753 0.265128457 1.622708967 1.80E-10 5.08E-06 0.42 0.039

SHROOM3 0.524115493 0 0.607972231 1.90E-10 5.35E-06 0.361 0

PXDN 0.519392528 0.004229195 0.597406058 2.04E-10 5.75E-06 0.372 0.013

GRK6 1.72429637 0.426333312 0.933572502 2.59E-10 7.29E-06 0.668 0.545

TCF4 1.503370851 0.352159617 0.888606562 2.59E-10 7.29E-06 0.614 0.351

CPNE5 0.911855165 0.124714692 0.765414157 2.60E-10 7.33E-06 0.495 0.143

GPRIN3 1.440510267 0.282694043 0.928005731 2.68E-10 7.55E-06 0.594 0.312

TBCA 3.593103023 1.714865928 0.75858819 3.01E-10 8.47E-06 0.842 0.87

HIST1H1B 0.795367003 3.893757819 -1.446663923 3.14E-10 8.85E-06 0.354 0.623

C11orf96 0.755243625 0 0.811671288 3.34E-10 9.40E-06 0.354 0

HSP90AA1 16.61103702 9.518169467 0.743596218 3.48E-10 9.80E-06 0.972 0.987

EIF2S2 4.73664989 2.646007409 0.653890979 3.91E-10 1.10E-05 0.882 0.961

SLAMF7 3.196929906 1.148910552 0.965728937 5.00E-10 1.41E-05 0.756 0.831

MIF 4.525491657 7.538694222 -0.627912622 5.73E-10 1.61E-05 0.882 0.948

CCT3 5.940925481 3.389042705 0.661221733 5.77E-10 1.63E-05 0.902 0.961

HAX1 4.115389067 2.197547996 0.677877958 6.97E-10 1.96E-05 0.843 0.909

UQCR10 4.647660735 2.495231737 0.692265315 7.05E-10 1.99E-05 0.884 0.948

CHD7 0.968040305 0.144016116 0.782652391 7.48E-10 2.11E-05 0.526 0.234

SCAND1 2.662552898 1.063368812 0.827847881 7.50E-10 2.11E-05 0.779 0.766

FAM27C 0.94795731 0.114040719 0.806160096 9.07E-10 2.56E-05 0.496 0.182

PEG10 0.586801369 0 0.666121547 1.02E-09 2.88E-05 0.34 0

TMED9 3.218816132 1.560778272 0.720255871 1.07E-09 3.00E-05 0.794 0.805

UQCR11 4.198551556 2.283740853 0.662769432 1.40E-09 3.96E-05 0.855 0.909

MT-ND4L 6.933183003 3.899076873 0.6953899 1.54E-09 4.34E-05 0.893 0.922

PSMB8 3.03359653 1.448866146 0.719952863 1.67E-09 4.71E-05 0.799 0.792

DERL1 2.757256428 1.13854953 0.81304696 2.01E-09 5.65E-05 0.765 0.792

TXNDC5 1.628806624 0.443309855 0.865026964 2.08E-09 5.86E-05 0.661 0.506

MINDY3 1.016350412 0.094772413 0.881115393 2.37E-09 6.68E-05 0.478 0.182

TAP1 2.049263851 0.641263211 0.893654367 2.57E-09 7.23E-05 0.694 0.571

MTDH 14.31441264 9.049843881 0.607716945 2.89E-09 8.14E-05 0.944 0.987

AL133467.1 0.651093097 0.061199265 0.637725887 2.90E-09 8.18E-05 0.394 0.052

CDK6 1.911632741 0.535319676 0.923289315 3.03E-09 8.53E-05 0.659 0.545

MYL12A 3.751785522 1.683577364 0.82431224 3.33E-09 9.37E-05 0.826 0.883

SSU72 2.018105093 0.716892871 0.813843021 3.48E-09 9.81E-05 0.724 0.688

RAD21 2.931842511 1.053767634 0.936932574 4.15E-09 0.000116909 0.747 0.818

CD320 2.759671538 0.973101472 0.930141475 4.42E-09 0.000124617 0.747 0.766

HSP90AB1 16.30948299 10.17790116 0.630913311 4.92E-09 0.000138515 0.975 1

CLEC7A 0.574425145 0.012304134 0.637182373 5.03E-09 0.000141715 0.337 0.013

RALGPS2 2.105446618 0.592380889 0.963615306 5.29E-09 0.000148979 0.677 0.545

IDH3A 1.01226529 0.161346463 0.793022084 5.43E-09 0.000153022 0.529 0.273

EIF3H 4.2183253 2.220575409 0.696268409 6.18E-09 0.000173984 0.869 0.948

CNDP2 1.517248632 0.362886124 0.885182697 6.49E-09 0.000182754 0.634 0.481

LAMC1 0.821654 0.139663277 0.676641332 6.84E-09 0.0001928 0.493 0.195

DEPP1 0.513599416 0.008580498 0.585657202 6.90E-09 0.000194446 0.331 0.013

MGMT 0.863421371 0.181253521 0.657635315 1.07E-08 0.000302332 0.495 0.169

MYBL2 1.262635778 0.300432961 0.79901234 1.33E-08 0.00037381 0.579 0.338

HOMER3 2.244759447 0.453805142 1.158277613 1.62E-08 0.000457536 0.599 0.416

DUSP23 0.719593633 0.094477622 0.651825216 1.64E-08 0.000460612 0.445 0.143

RCSD1 0.893811535 0.231102198 0.621342236 1.92E-08 0.000541033 0.485 0.156

SOX4 0.964272215 0.306607491 0.588169061 2.27E-08 0.000640391 0.479 0.143

MINOS1 2.922932559 1.342926197 0.743621024 2.60E-08 0.000731111 0.792 0.831

EPB41L2 0.550836227 0.026173488 0.595771684 2.90E-08 0.000817506 0.358 0.065

SLC39A4 0.637878671 0.062074044 0.624944141 2.97E-08 0.000838002 0.4 0.104

FAM50A 1.487986387 0.49230026 0.737440748 3.17E-08 0.000891674 0.643 0.468

JUN 4.092418646 1.192109601 1.216031096 3.18E-08 0.000897185 0.673 0.545

GHITM 2.637010604 1.12137001 0.777756854 3.60E-08 0.001013318 0.785 0.779

AIM2 0.8499833 0.154814478 0.679851147 5.22E-08 0.001469528 0.447 0.143

CKS1B 3.012010715 1.154266895 0.897128461 5.59E-08 0.001574218 0.754 0.74

IGHG4 0.296349872 3.352577251 -1.747414763 5.90E-08 0.001662622 0.128 0.338

PFDN2 2.847490535 1.315731176 0.732449991 6.47E-08 0.001823587 0.785 0.844

CSKMT 0.646833991 0.058038311 0.638303264 7.80E-08 0.00219707 0.394 0.117

MORF4L2 2.163186079 0.789901956 0.821497863 7.94E-08 0.002238082 0.721 0.675

ATP5MPL 4.100717224 2.240378175 0.654537927 1.01E-07 0.002856567 0.859 0.935

TP53INP1 1.155094879 0.354050642 0.670469689 1.14E-07 0.003225241 0.523 0.247

PLA2G16 1.793938926 0.485261345 0.911583676 1.25E-07 0.003521913 0.637 0.545

SEM1 2.768794109 1.325997248 0.696253592 1.33E-07 0.003736176 0.785 0.805

OXR1 0.853041348 0.160985421 0.674545218 1.48E-07 0.00417622 0.504 0.299

VDAC3 1.988804537 0.666043622 0.843142375 1.51E-07 0.004265777 0.689 0.61

ATP6V1F 2.227967254 0.946328855 0.729870453 1.58E-07 0.004462191 0.743 0.766

PAK1 0.687704602 0.093670718 0.625883975 1.94E-07 0.005452973 0.429 0.169

BMP8B 0.721072564 0.09673957 0.65008694 2.44E-07 0.00685951 0.429 0.182

VPS28 2.182091308 0.92161549 0.727655547 2.86E-07 0.008055913 0.741 0.779

CD79B 1.180908087 0.435400129 0.603476014 2.95E-07 0.008310614 0.558 0.312

ENY2 2.640215344 1.319496783 0.650211953 5.24E-07 0.014754991 0.781 0.805

DDX10 0.866525613 0.165249022 0.679717004 5.81E-07 0.016354765 0.49 0.286

PLIN2 0.710554304 0.124566068 0.605095483 5.87E-07 0.016549402 0.453 0.221

SPTBN1 2.030500968 0.581166975 0.938566576 5.96E-07 0.016781196 0.629 0.584

WIPI1 1.121464126 0.329176021 0.674528111 6.12E-07 0.017227321 0.559 0.351

NDUFV2 3.704694946 2.00459018 0.646932957 6.17E-07 0.017377589 0.83 0.909

ATP6AP1 1.005263721 0.293795553 0.632182325 6.87E-07 0.019353272 0.552 0.364

EMP3 4.146713209 1.831869467 0.861896626 8.10E-07 0.022828276 0.795 0.922

ETFB 2.722570379 1.275724454 0.709973239 9.48E-07 0.02669975 0.781 0.753

EIF3J 2.766237057 1.28754642 0.71932279 9.61E-07 0.027073554 0.783 0.831

RNF19A 1.733356952 0.574302957 0.795960677 1.15E-06 0.032465357 0.646 0.623

STAT1 2.053905914 0.650880474 0.887419945 1.37E-06 0.038541172 0.641 0.532

PSMC3 2.056304136 0.841237787 0.731112159 1.39E-06 0.039083438 0.722 0.675

MANF 3.099863646 1.69017889 0.607873818 1.67E-06 0.046950083 0.782 0.844
