# Supplementary figures and images for: Revised International Staging System (R-ISS) stage-dependent analysis uncovers oncogenes and potential immunotherapeutic targets in multiple myeloma (MM)
Source: eLife journal article supplement (doi:10.7554/elife.75340), 2022-10-25

A

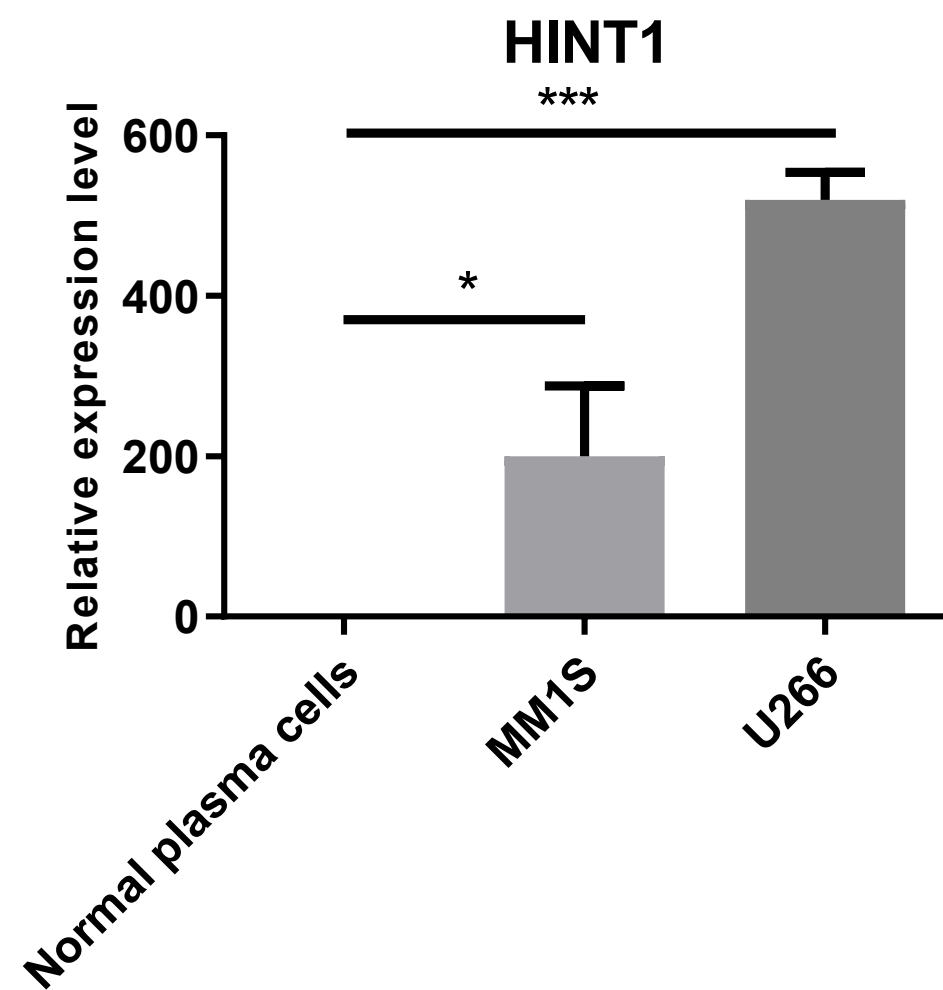

C

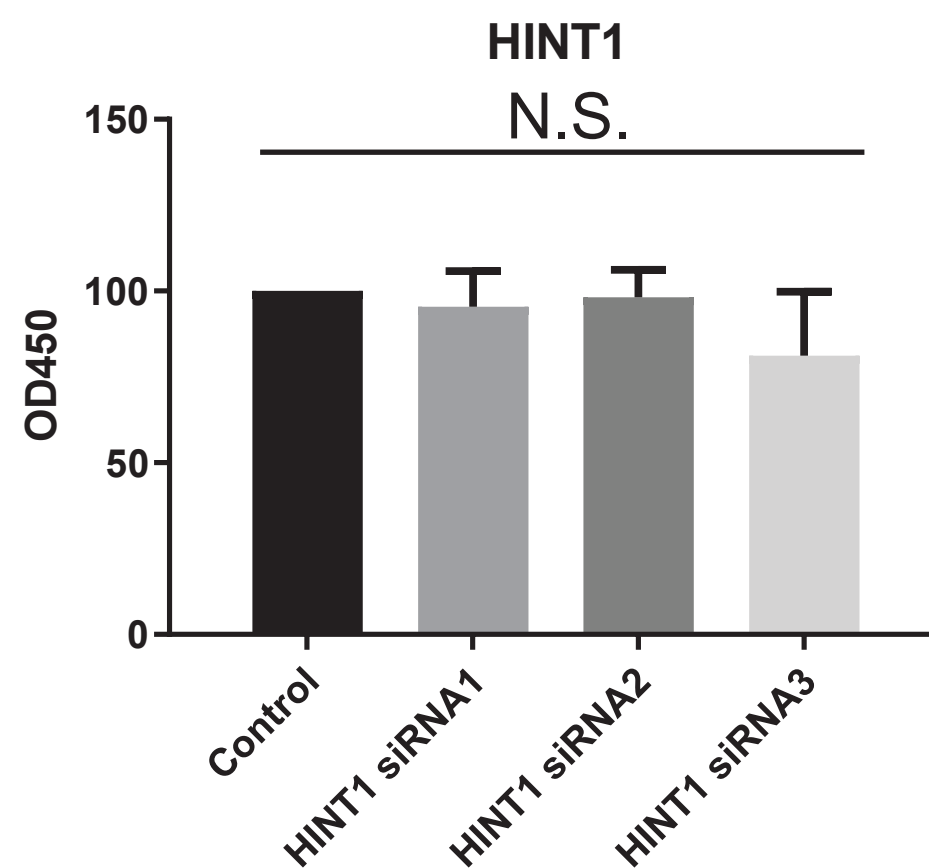

B

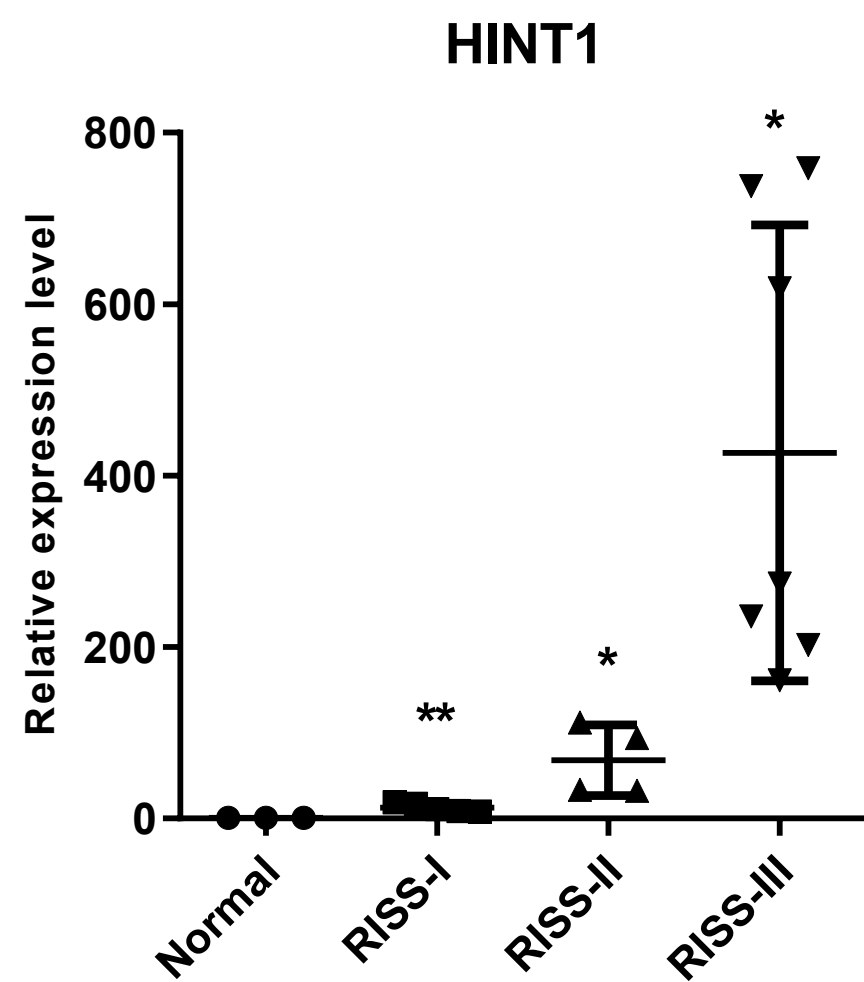

D

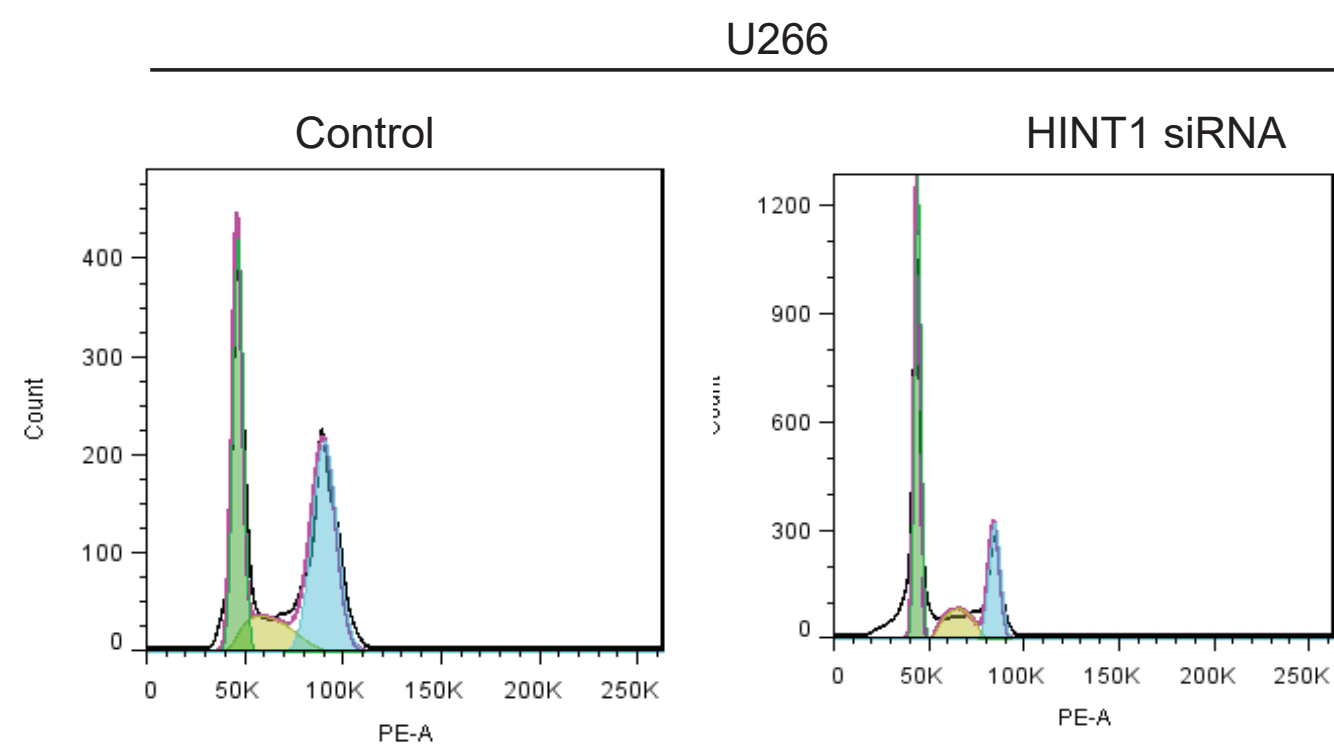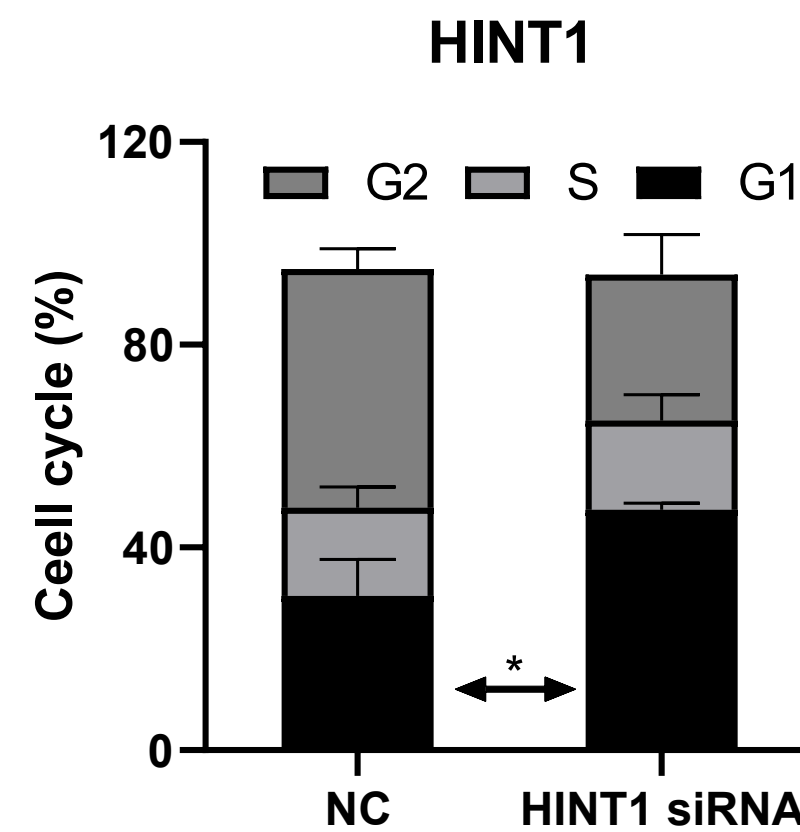

Supplement: supp [file elife-75340-supp-v1.zip]

E

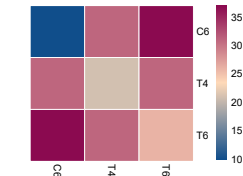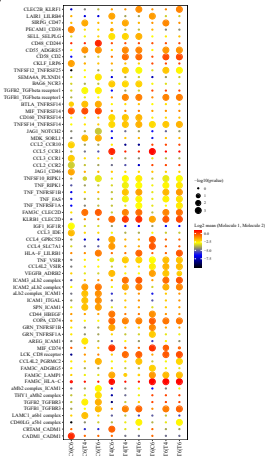

Supplement: supp [file elife-75340-supp-v1.zip]

PC13

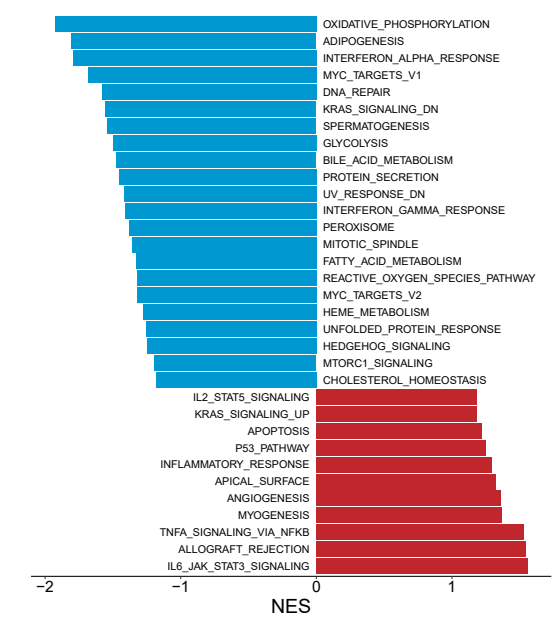

PC14

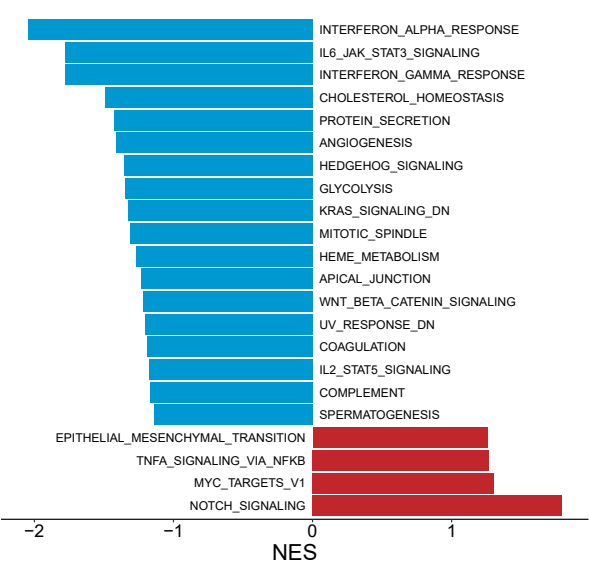

PC18

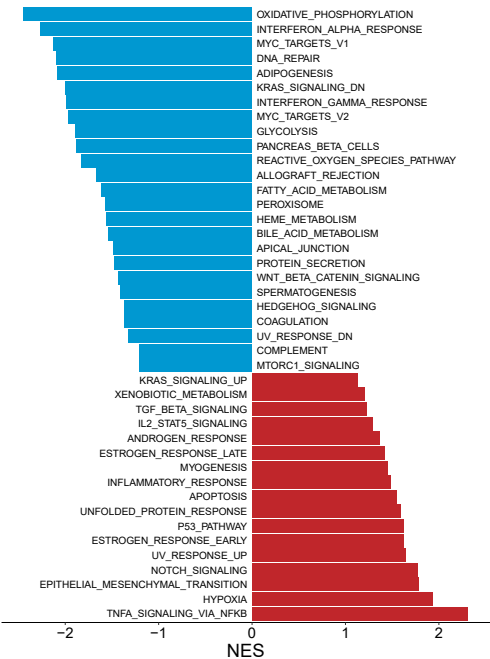

PC22

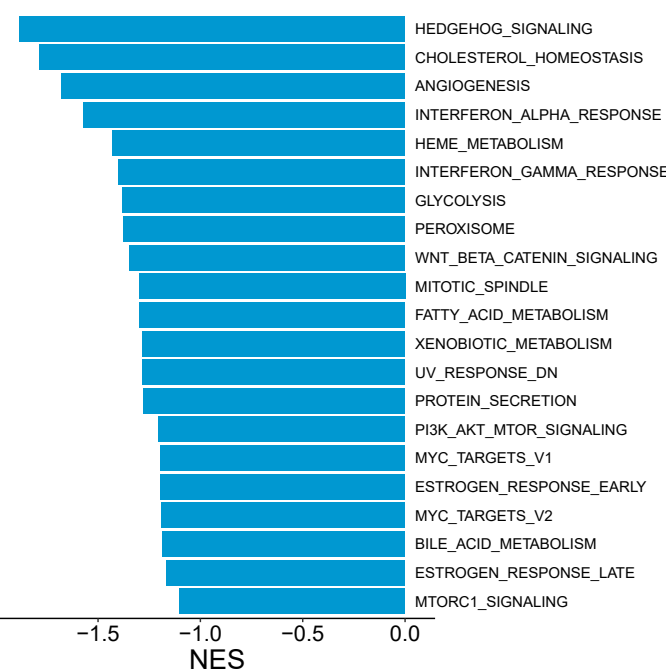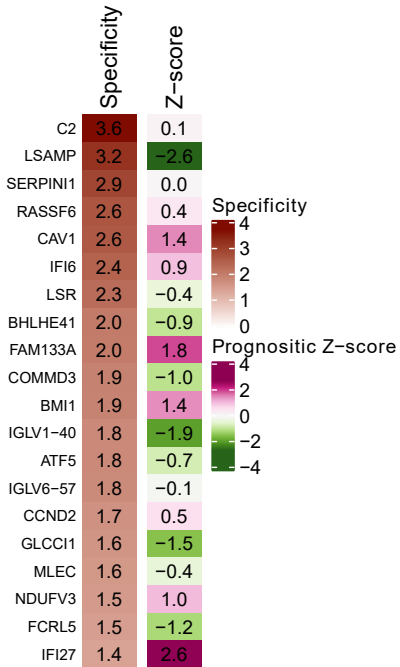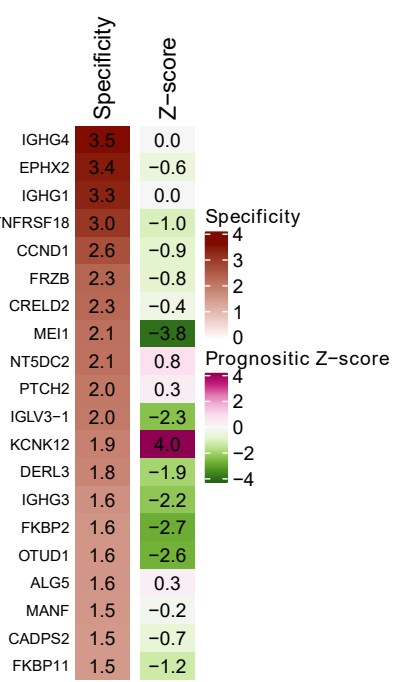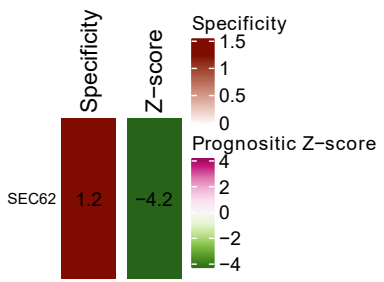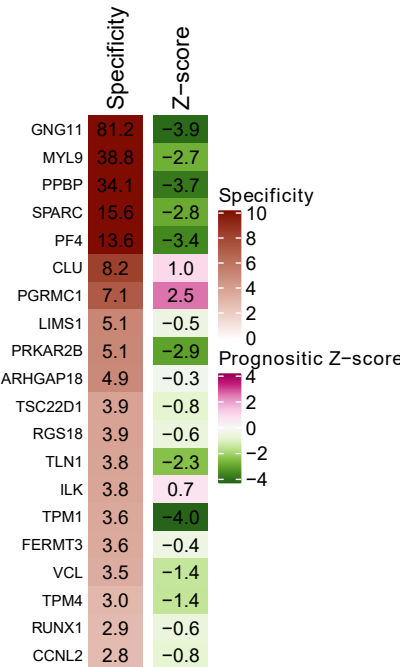

Supplement: supp [file elife-75340-supp-v1.zip]

A

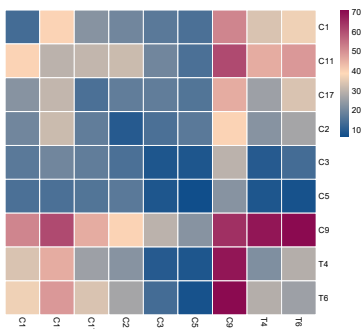

B

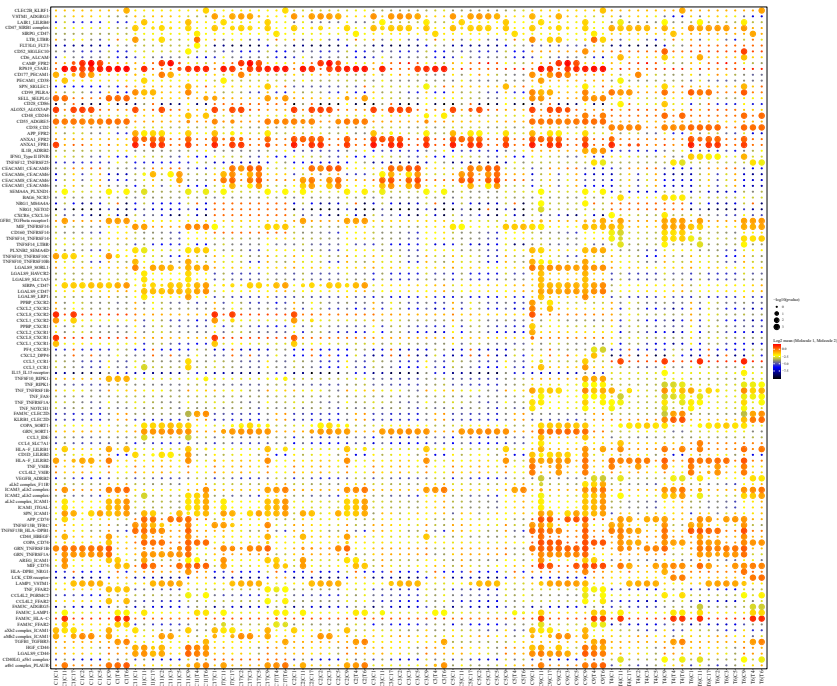

Supplement: supp [file elife-75340-supp-v1.zip]

A

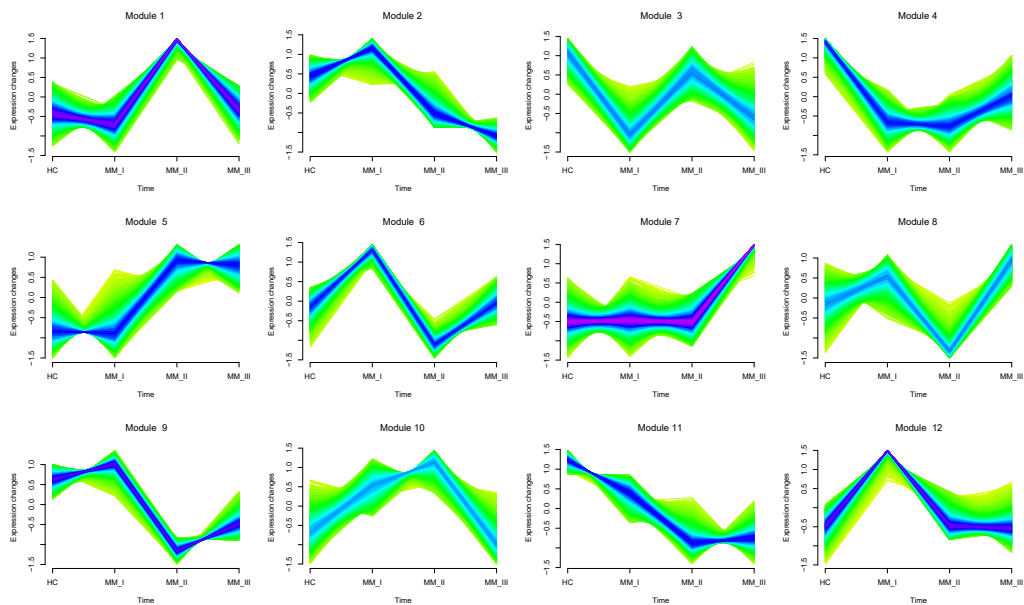

B

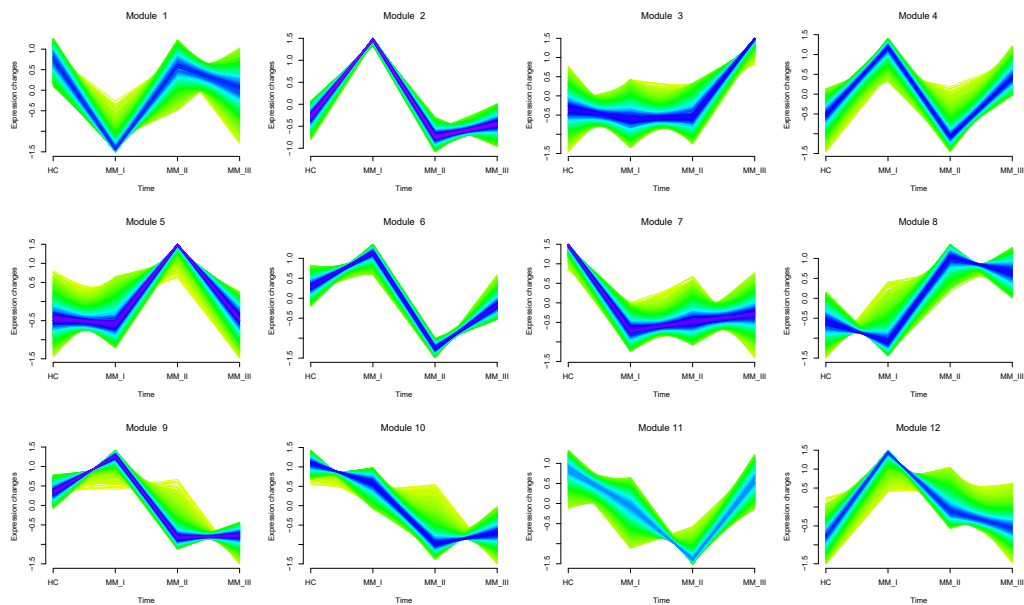

Supplement: supp [file elife-75340-supp-v1.zip]

A

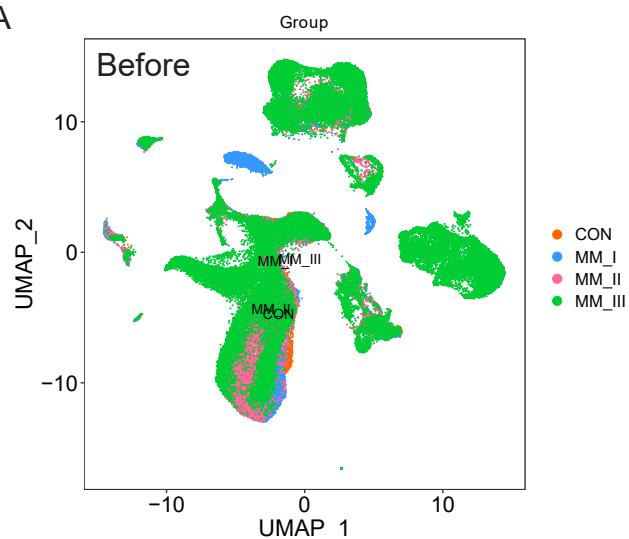

B

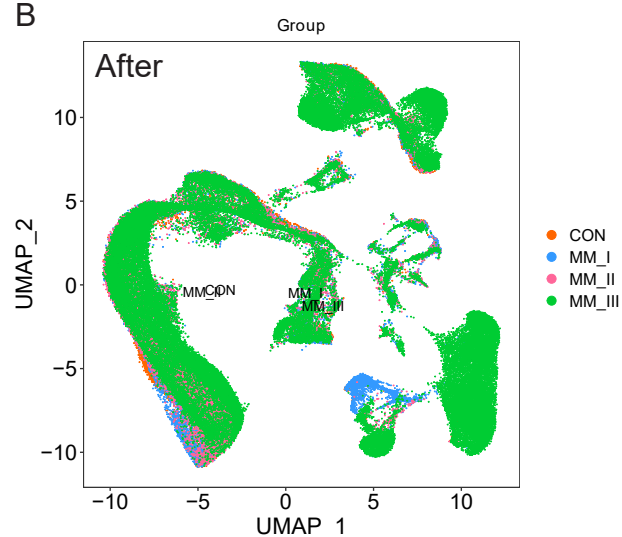

C

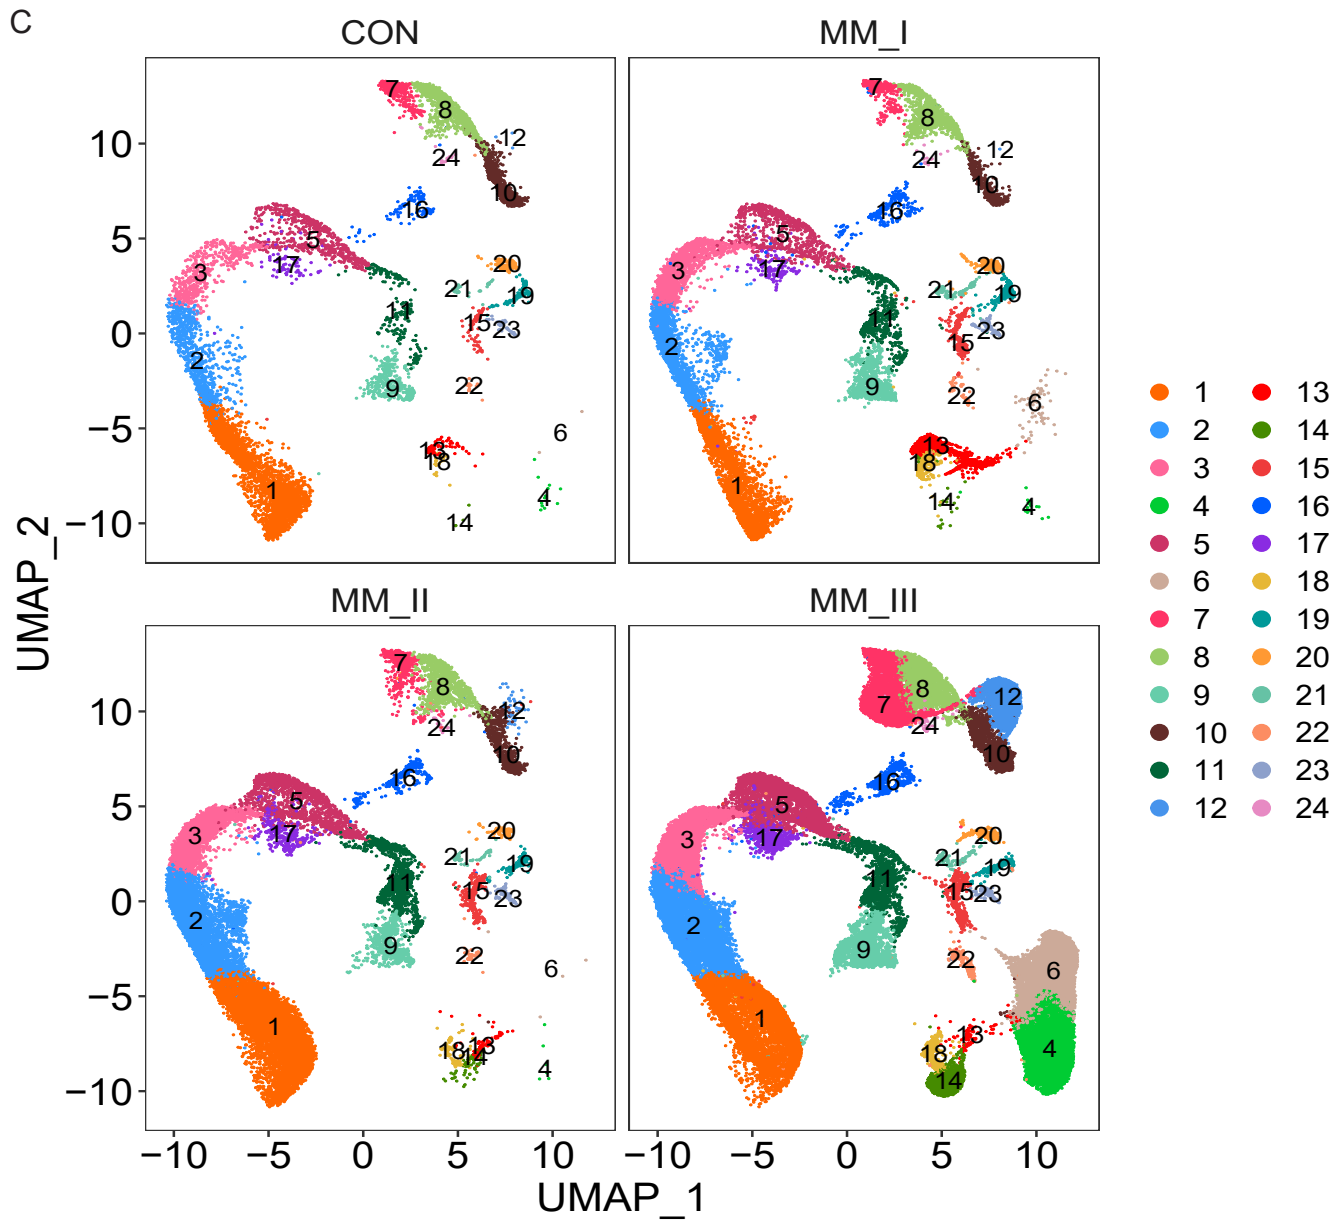

Supplement: supp [file elife-75340-supp-v1.zip › elife_poa_e75340_Figure_1_figure_supplement_1.pdf]

## CD38

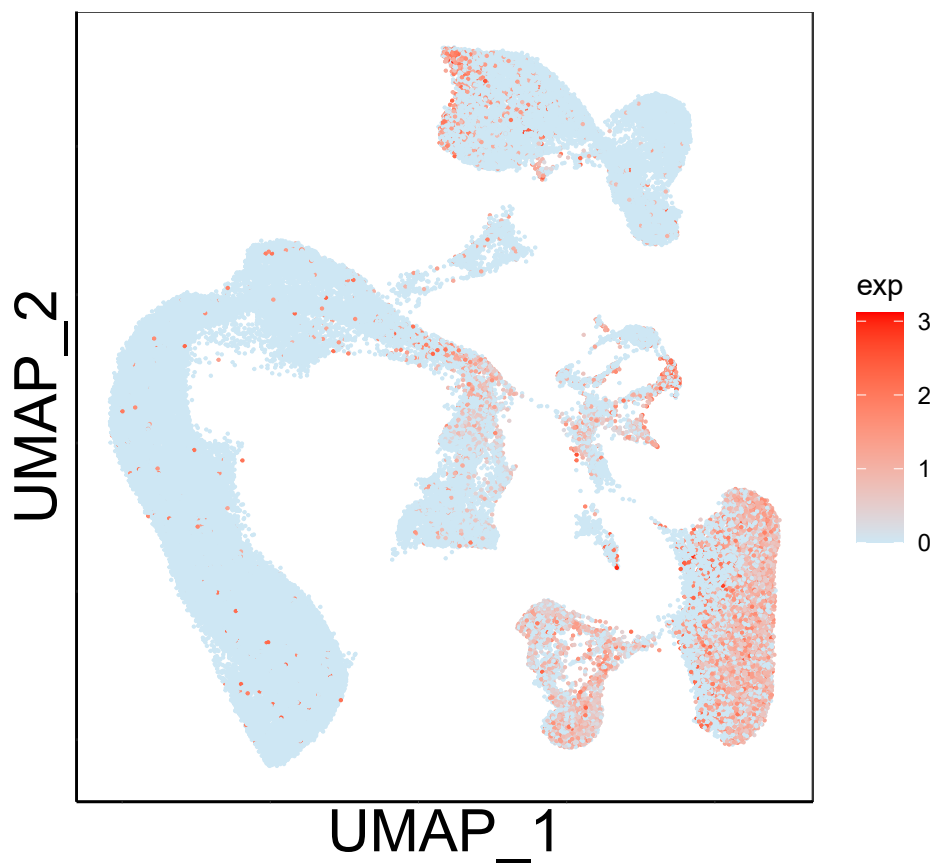

## SDC1

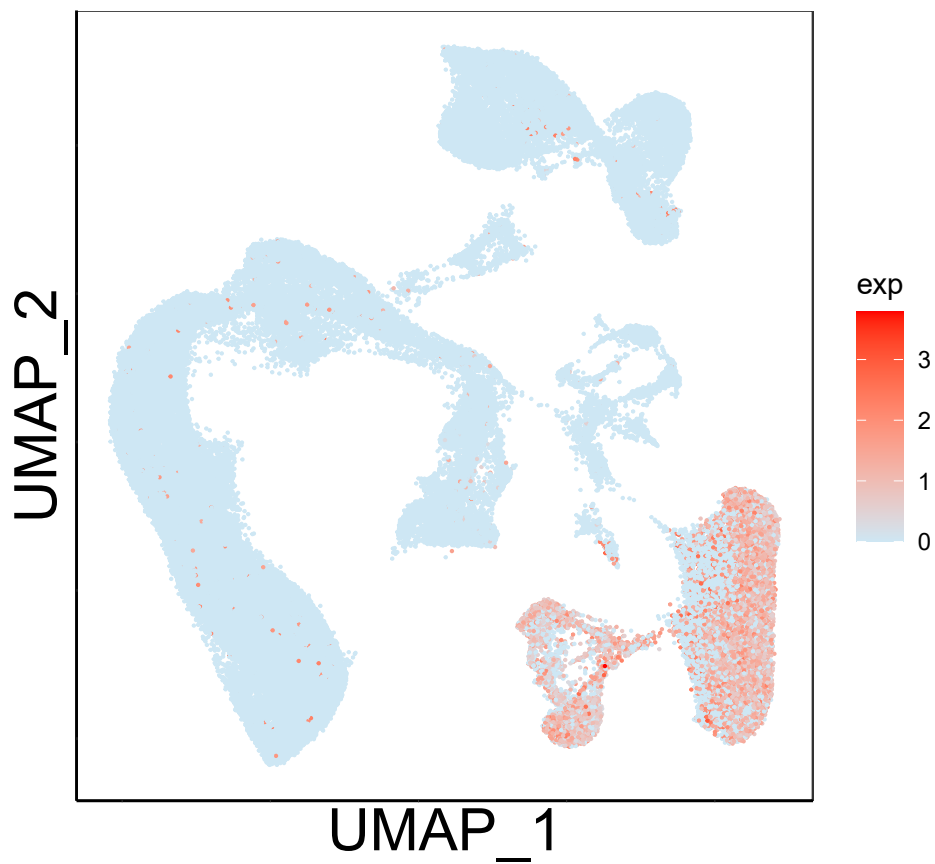

Supplement: supp [file elife-75340-supp-v1.zip › elife_poa_e75340_Figure_2_figure_supplement_1.pdf]

ISO-type

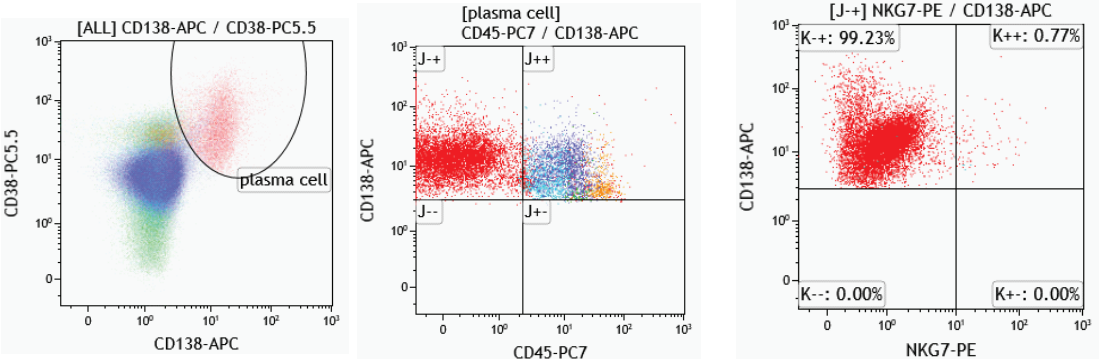

Stage-I

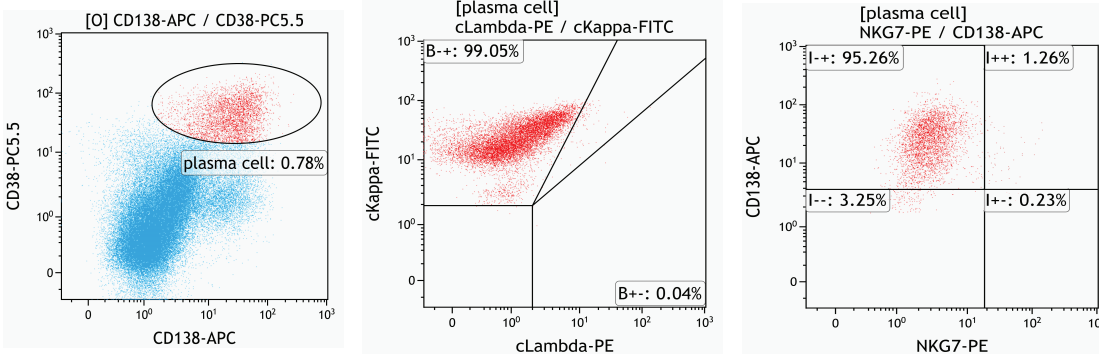

Stage-II

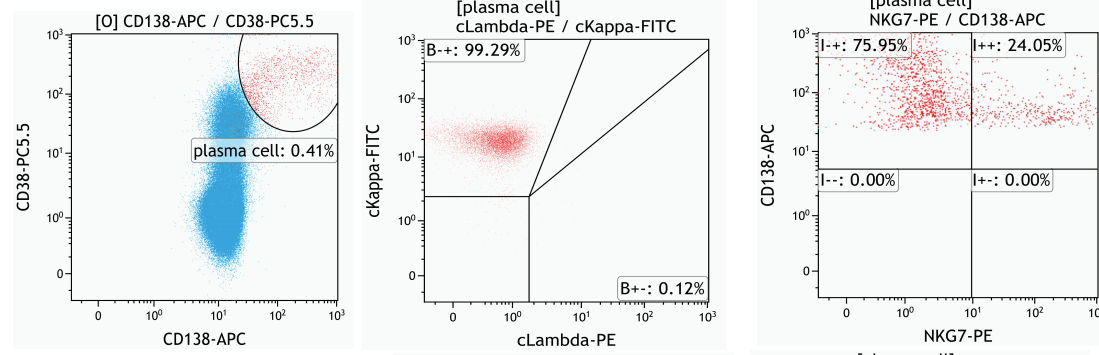

Stage-III

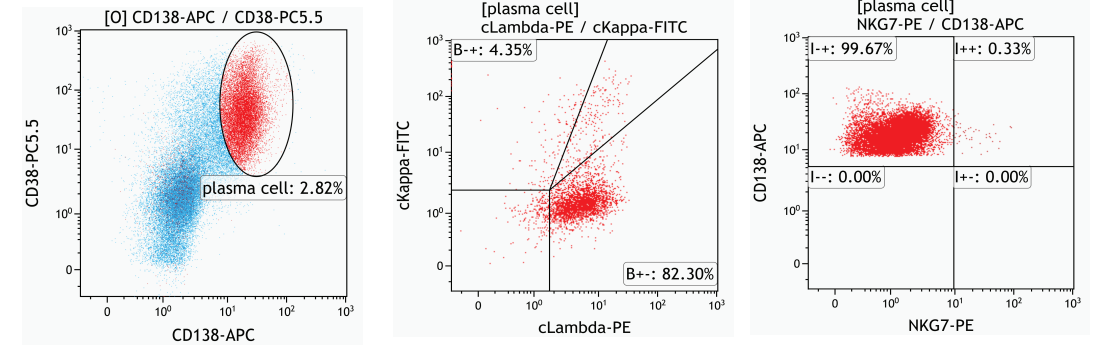

Supplement: supp [file elife-75340-supp-v1.zip › elife_poa_e75340_Figure_2_figure_supplement_2.pdf]

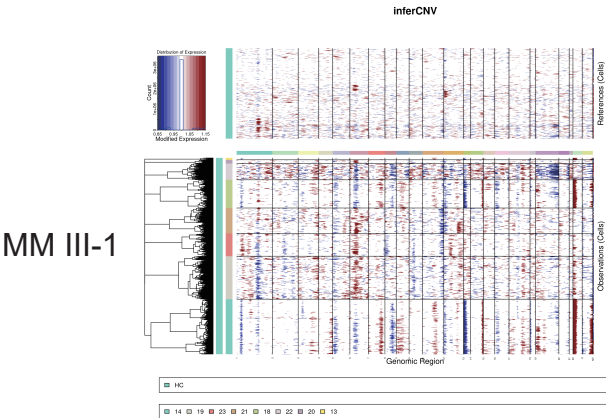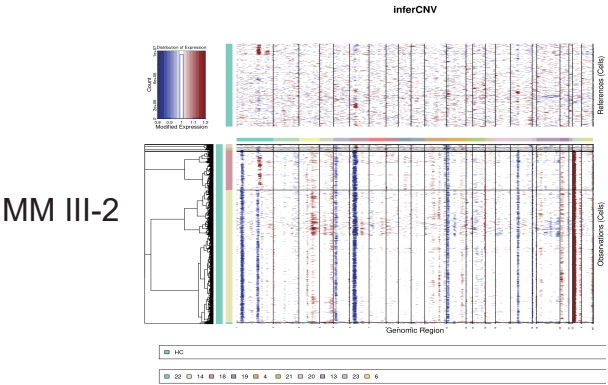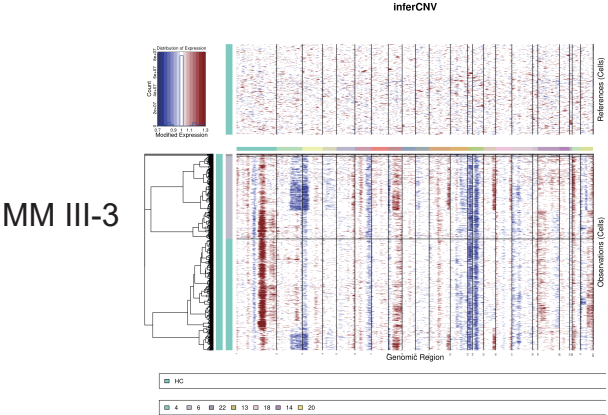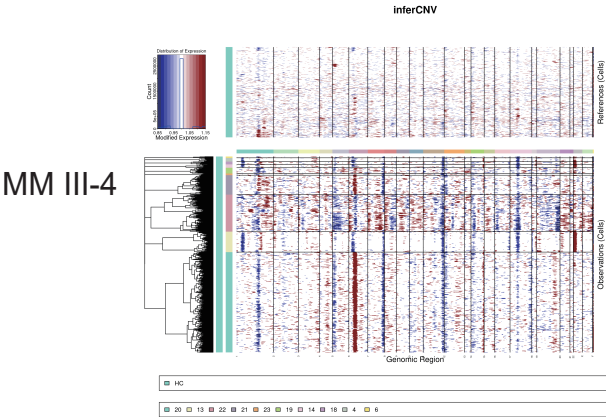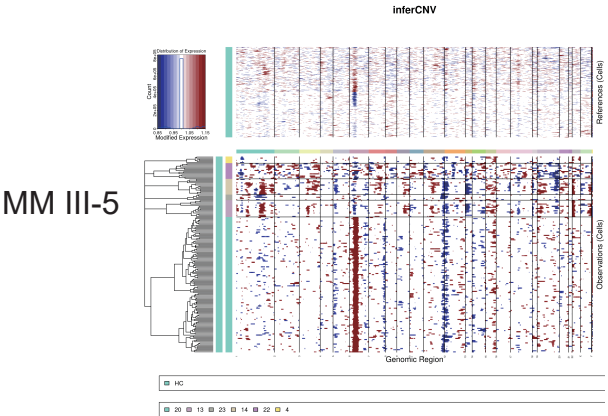

Supplement: supp [file elife-75340-supp-v1.zip › elife_poa_e75340_Figure_3_figure_supplement_1.pdf]

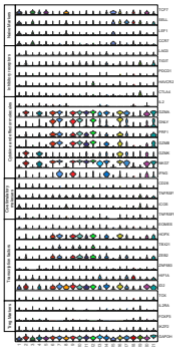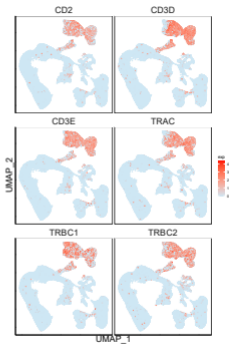

Supplement: supp [file elife-75340-supp-v1.zip › elife_poa_e75340_Figure_6_figure_supplement_1.pdf]
